# Supplementary material for: A novel TMTP1-modified theranostic nanoplatform for targeted in vivo NIR-II fluorescence imaging-guided chemotherapy for cervical cancer
Source: Royal Society of Chemistry journal article supplement (doi:10.1039/d1tb02481g), 2021-12-13
Supplement: d1tb02481g1.pdf [file d1tb02481g1.pdf]

## Supporting Information

### **A Novel TMTP1-Modified Theranostic Nanoplatfrom for Targeted *In Vivo* NIR-II Fluorescence Imaging-Guided Chemotherapy of Cervical Cancer**

Nuernisha Alifu<sup>\*a†</sup>, Rong Ma<sup>b†</sup>, Lijun Zhu<sup>a</sup>, Zhong Du<sup>b</sup>, Shuang Chen<sup>b</sup>, Ting Yan<sup>a</sup>, Gulinigaer Alimu<sup>a</sup>, Linxue Zhang<sup>a</sup>, Xueliang Zhang<sup>\*a</sup>

<sup>a</sup>State Key Laboratory of Pathogenesis, Prevention and Treatment of High Incidence Diseases in Central Asia School of Medical Engineering and Technology, Xinjiang Medical University, Urumqi, 830011, China.

<sup>b</sup>State Key Laboratory of Pathogenesis, Prevention, and Treatment of High Incidence Diseases in Central Asia, Department of Gynecology, The First Affiliated Hospital of Xinjiang Medical University, Urumqi 830054, China

\*E-mail: nens\_xjmu@126.com; shuxue2456@126.com

†These authors contributed equally.

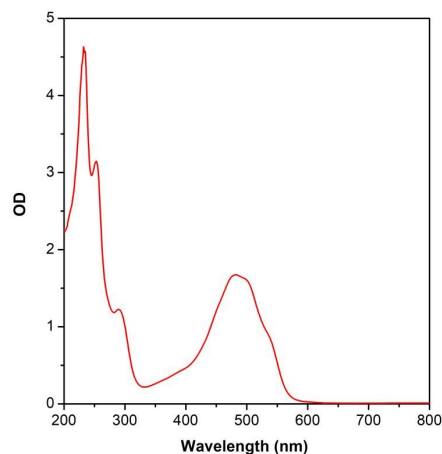

**Fig. S1** Absorption spectrum of DOX in aqueous solution.

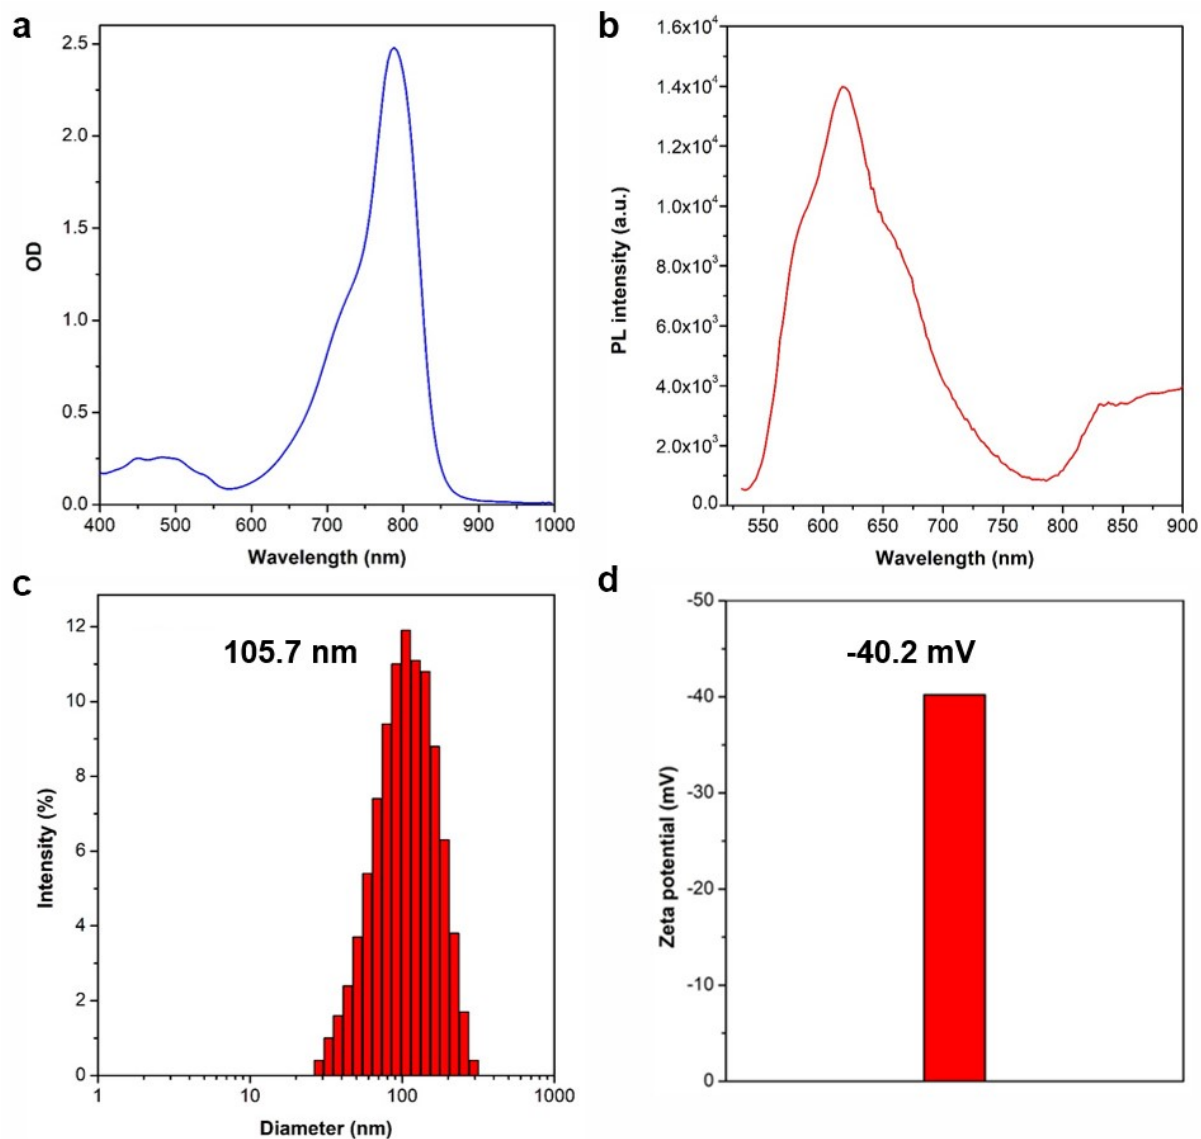

**Fig. S2** **a** Absorption, **b** fluorescence spectra, **c** dynamic light scattering (DLS) and **d** Zeta potential of IR-783-DOX NPs in aqueous dispersion.

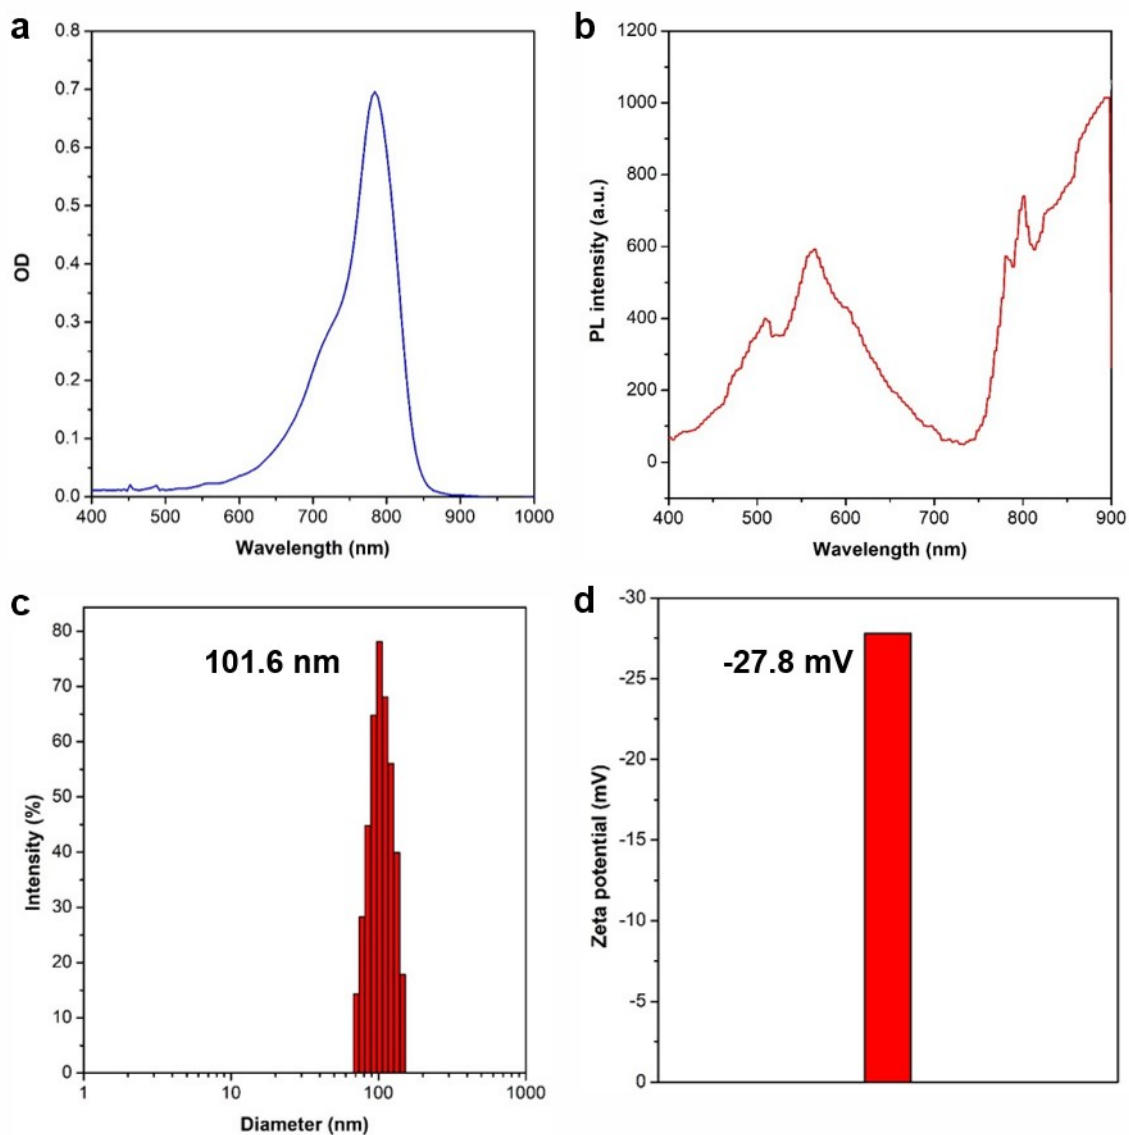

**Fig. S3** **a** Absorption, **b** fluorescence spectra, **c** DLS and **d** Zeta potential of IR-783-TMTP1 NPs in aqueous dispersion.

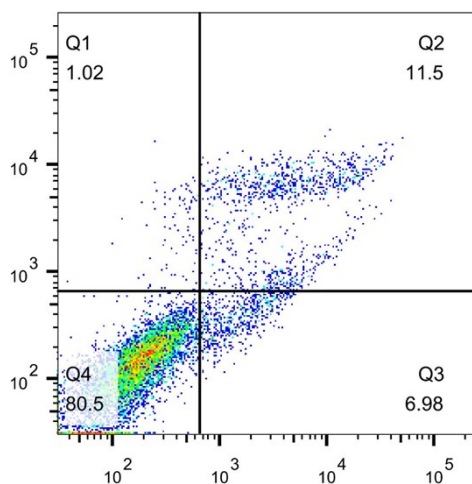

**Fig. S4** Flow cytometric detection results of HeLa cells (control group).

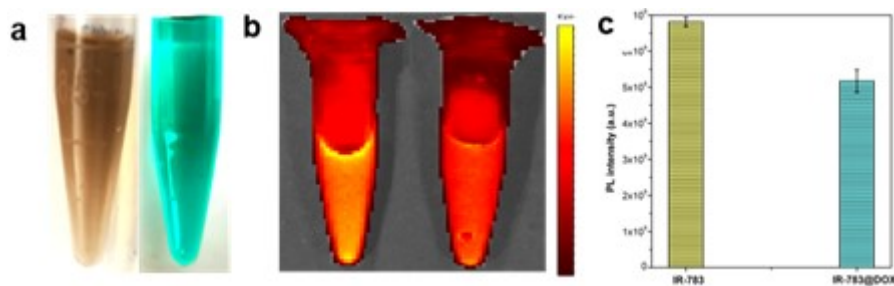

**Fig. S5** **a** IR-783-DOX-TMTP1 NPs and IR-783 in aqueous dispersion; **b** Corresponding near-infrared-I (NIR-I) images; **c** NIR-I fluorescence intensity analysis.

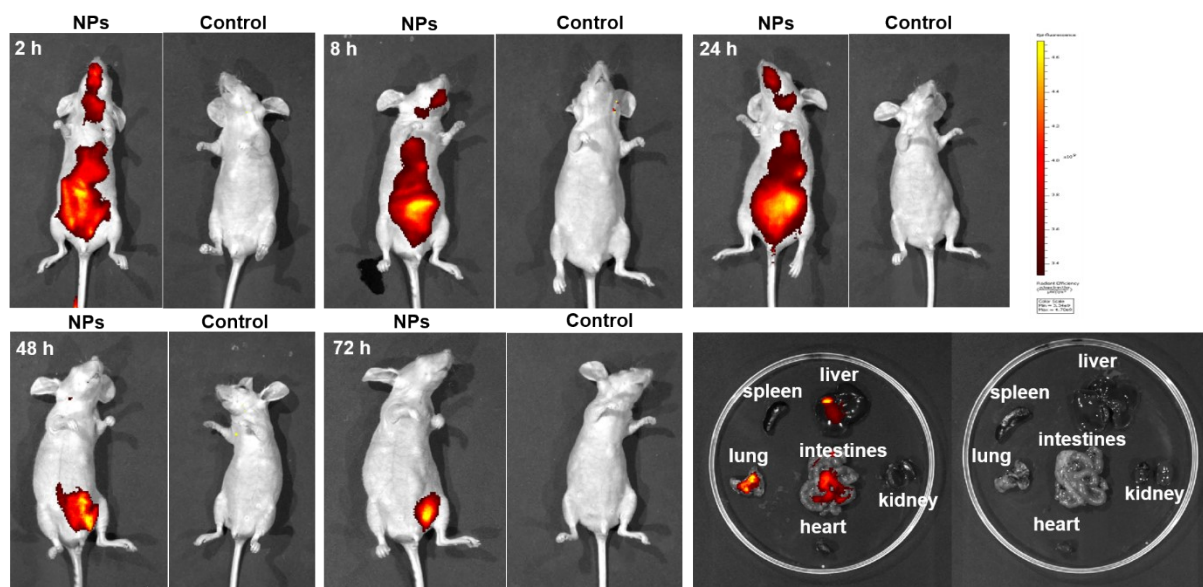

**Fig. S6** *In vivo* NIR-I fluorescence images of nude mouse injected with 1×PBS and IR-783-TMTP1 NPs in aqueous dispersion at various time points, and corresponding *ex vivo* NIR-I fluorescence images of major organs (liver, lung, spleen, heart, intestines and kidney) at 48 h of post-injection.  $\lambda_{ex}$ =745 nm,  $\lambda_{em}$ =840 nm.

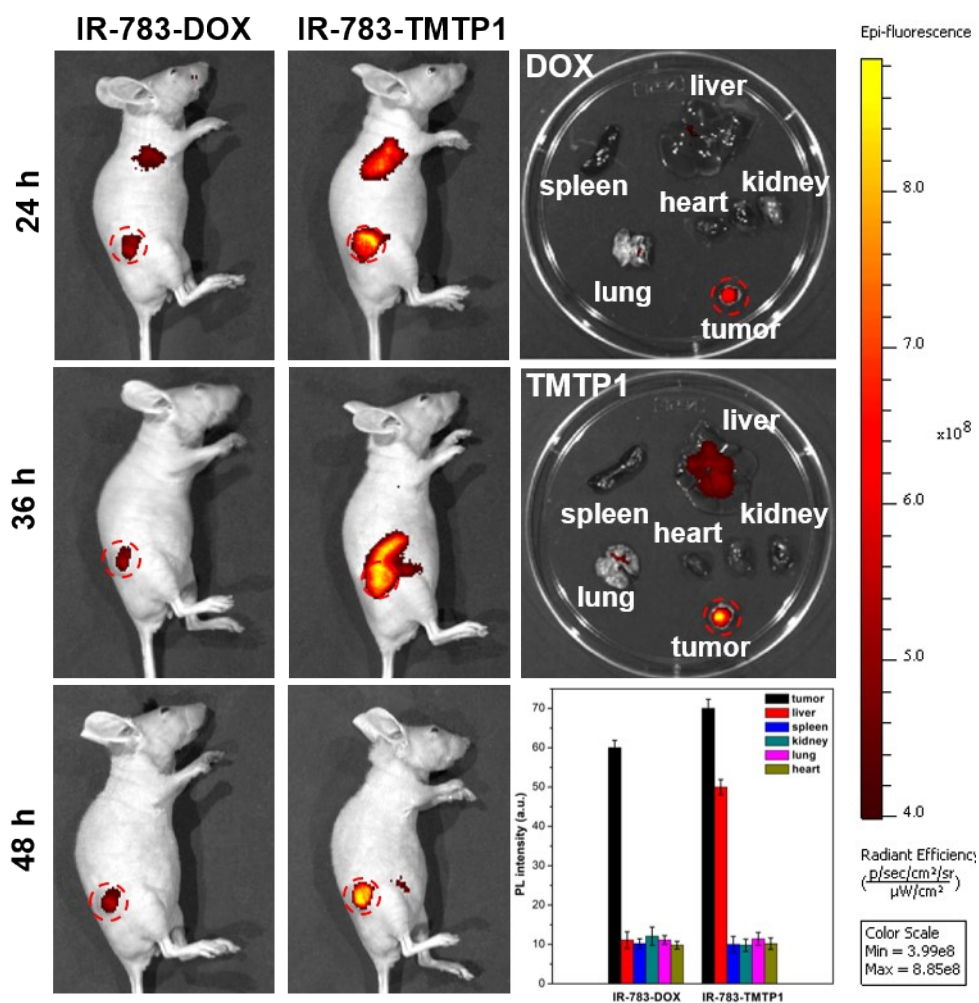

**Fig. S7** *In vivo* NIR fluorescence images tumor-bearing mouse injected with IR-783-DOX NPs and IR-783-TMTP1 NPs in aqueous dispersion.  $\lambda_{ex}=745$  nm,  $\lambda_{em}=840$  nm.

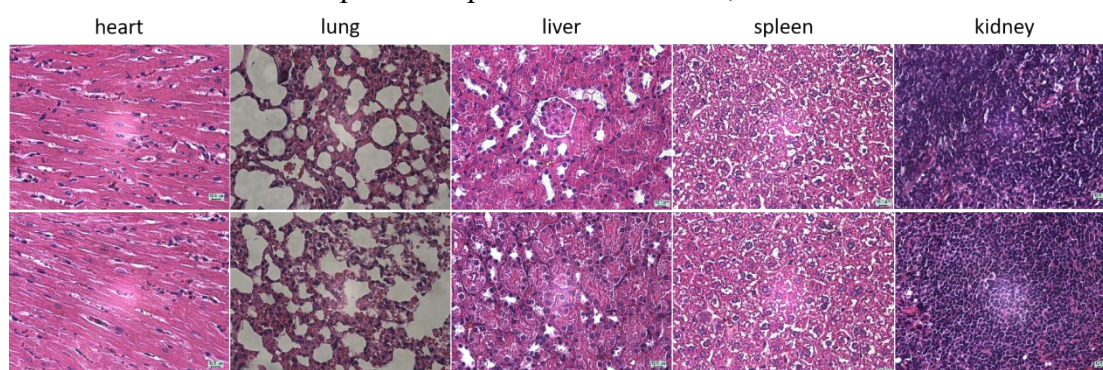

**Fig. S8** Microscopic images of tissue sections from the mice intravenously injected with 1×PBS (down line, 200  $\mu$ L) and IR-783-DOX-TMTP1 NPs (upper line, 1 mg/mL, 200  $\mu$ L) for 24 hours.



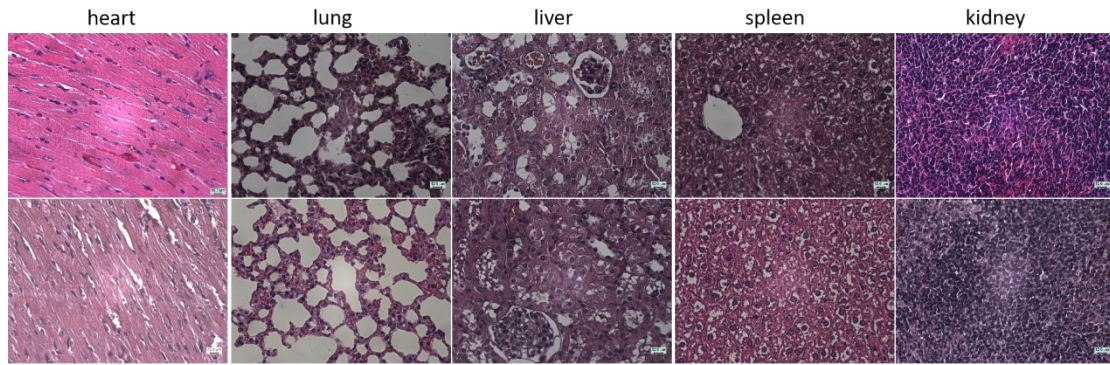

**Fig. S9** Microscopic images of tissue sections from the mice intravenously injected with 1×PBS (down line, 200  $\mu$ L) and IR-783-DOX-TMTP1 NPs (upper line, 1 mg/mL, 200  $\mu$ L) for 7 days

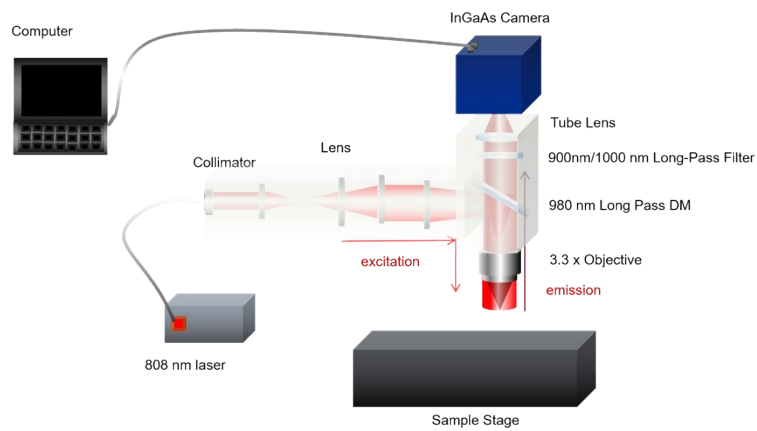

**Fig. S10** Schematic illustration of NIR-II fluorescence microscopic imaging system.

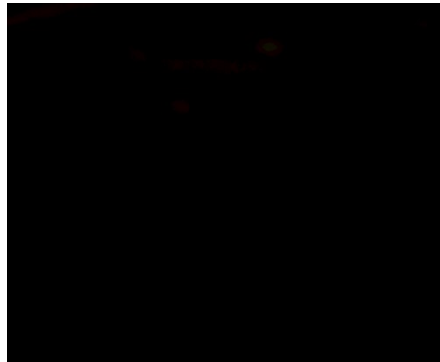

**Fig. S11** NIR-II fluorescence microscopic images of ear blood vessels treated with PBS.

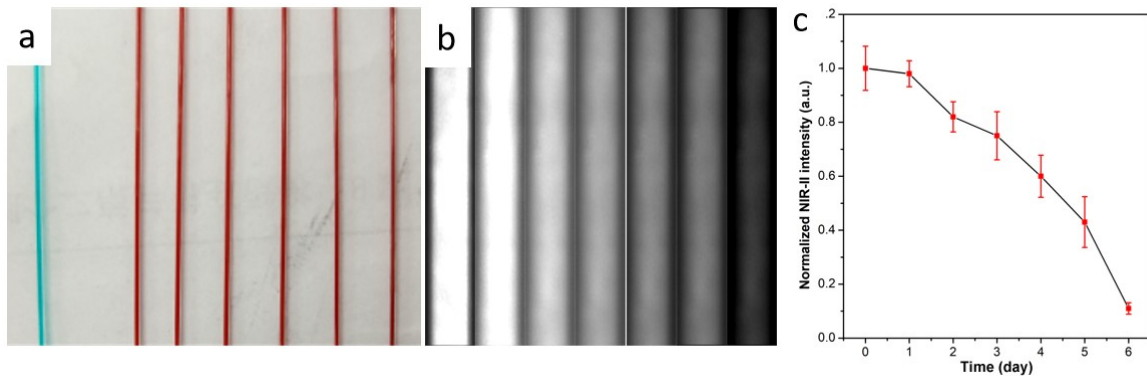

**Fig. S12** *In vivo* blood circulation analysis of IR-783-DOX-TMTP1 NPs.

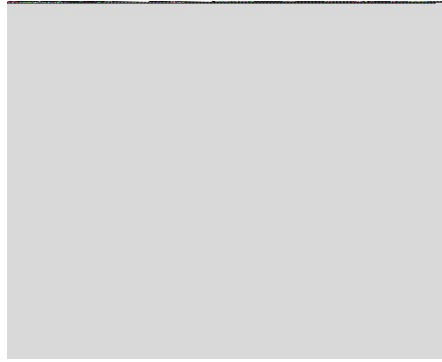

**Fig. S13** NIR-II fluorescence microscopic images of tumour blood vessels treated with PBS under 808 nm laser excitation.

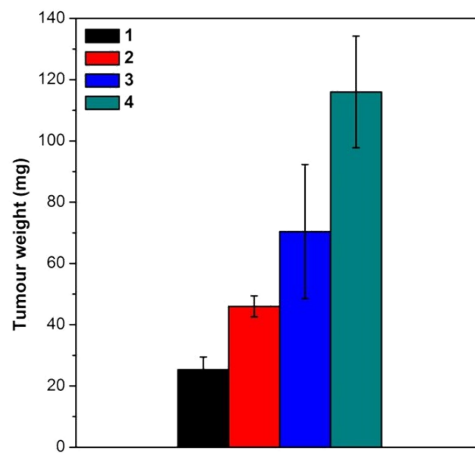

**Fig. S14** Body weight of therapeutic agents did not cause any significant loss of mouse body weight during the entire treatment process. Data were displayed as the mean  $\pm$  SD (n =4).
